# Supplementary material
Source: Springer Nature journal article supplement (https://www.springermedizin.de/resource/supplementary/12936_2009_975_MOESM2_ESM.pdf/9548682)

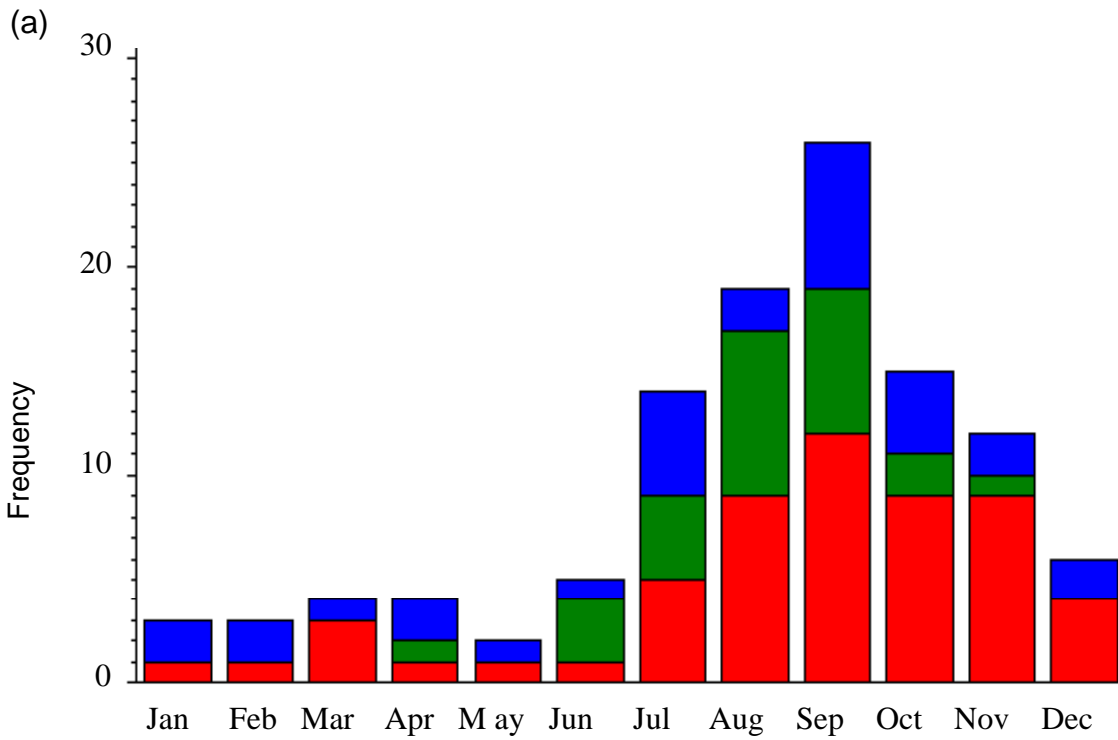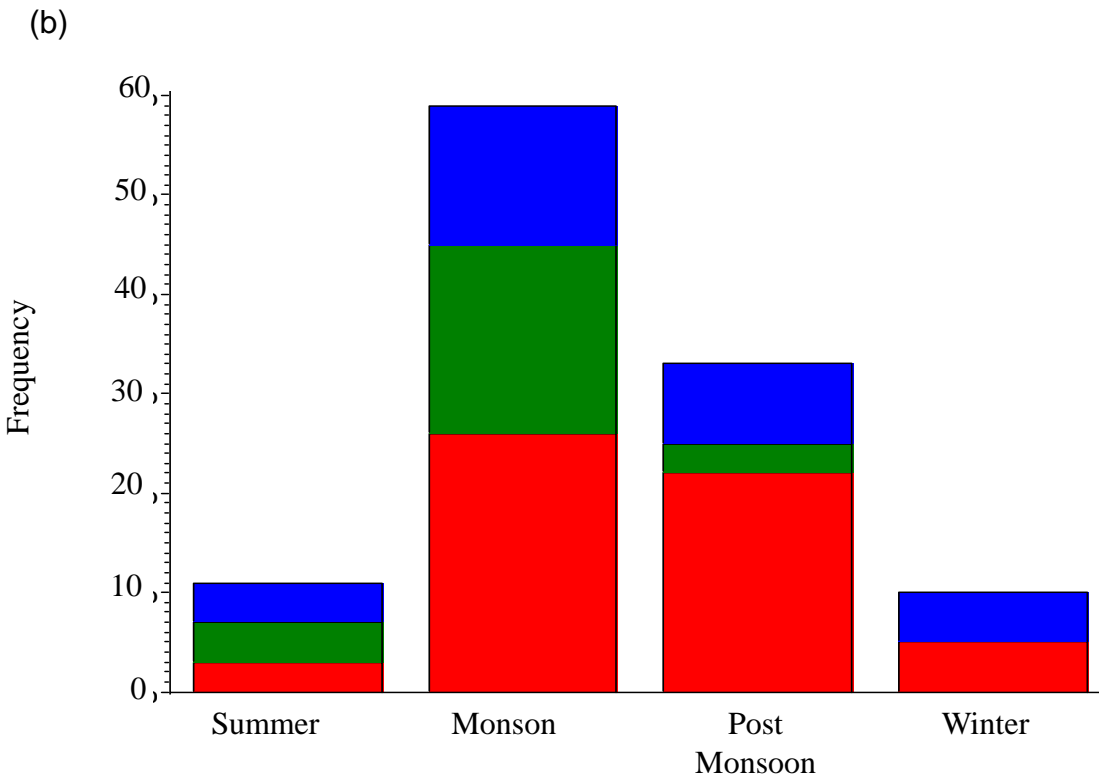

 *Plasmodium falciparum*

 *Plasmodium vivax*

 Unknown *Plasmodium*

Supplement: MOESM2 [file 9548682]
